1

## Main Manuscript

2

# **NODAL/TGF $\beta$ signalling mediates the self-sustained stemness induced by *PIK3CA*<sup>H1047R</sup> homozygosity in pluripotent stem cells**

3

4 Ralitsa R. Madsen<sup>1,2,3,8,\*</sup>, James Longden<sup>4,5</sup>, Rachel G. Knox<sup>2,3</sup>, Xavier Robin<sup>4</sup>, Franziska Völlmy<sup>4</sup>,  
5 Kenneth G. Macleod<sup>6</sup>, Larissa S. Moniz<sup>7</sup>, Neil O. Carragher<sup>6</sup>, Rune Linding<sup>4,5</sup>, Bart  
6 Vanhaesebroeck<sup>7</sup>, Robert K. Semple<sup>1\*</sup>

7 <sup>1</sup>Centre for Cardiovascular Science, Queen's Medical Research Institute, University of Edinburgh,  
8 Edinburgh, UK.

9 <sup>2</sup>Metabolic Research Laboratories, Wellcome Trust-MRC Institute of Metabolic Science, University  
10 of Cambridge, Cambridge, UK.

11 <sup>3</sup>The National Institute for Health Research Cambridge Biomedical Research Centre, Cambridge,  
12 UK.

13 <sup>4</sup>Biotech Research and Innovation Centre, University of Copenhagen, Copenhagen, Denmark.

14 <sup>5</sup>Humboldt-Universität zu Berlin, Berlin, Germany.

15 <sup>6</sup>Edinburgh Cancer Research UK Centre, Institute of Genetics and Molecular Medicine, University  
16 of Edinburgh, Western General Hospital, Crewe Road South, Edinburgh, UK.

17 <sup>7</sup>University College London Cancer Institute, Paul O'Gorman Building, University College London,  
18 London, UK.

19 <sup>8</sup>Current Address: Cell Signalling, University College London Cancer Institute, Paul O'Gorman  
20 Building, University College London, London, UK.

21

22

23 \*Corresponding authors: Ralitsa R. Madsen (R.R.M.), Robert K. Semple (R.K.S.)

24 **Email:** r.madsen@ucl.ac.uk (R.R.M.); rsemple@ed.ac.uk (R.K.S.)

25 0000-0001-8844-5167 (R.R.M.)

26 0000-0001-6539-3069 (R.K.S.)

### 27 **Keywords**

28 PI3K, *PIK3CA*, stemness, pluripotent stem cells

29 **Author Contributions**

30 Overall conceptualisation and study design by R.R.M. and R.K.S., with important contributions from  
31 B.V. (PI3K signalling biology, MEF data), R.L. and J.L. (total proteomics and WGCNA). R.R.M. and  
32 R.G.K. performed all hPSC experiments. F.V. performed the mass spectrometry experiments, and  
33 X.R. performed MCMC computational analysis. L.M. performed the MEF experiment. K.M. and  
34 N.C. were responsible for RPPA sample processing, and R.R.M. carried out statistical analysis.  
35 R.R.M. performed all RNA sequencing quantitation and IPA analyses on transcriptomic and  
36 proteomic datasets. R.R.M., X.R., J.L., F.V. and R.G.K. were responsible for data curation. R.R.M.,  
37 B.V. and R.K.S. wrote the manuscript. R.L., J.L., N.C., X.R., L.M., and F.V. reviewed and edited  
38 the final version.

39 **This PDF file includes:**

40 Main Text  
41 Figures 1 to 5

42 **Abstract**

43 Activating *PIK3CA* mutations are known “drivers” of human cancer and developmental overgrowth syndromes.  
44 We recently demonstrated that the “hotspot” *PIK3CA*<sup>H1047R</sup> variant exerts unexpected allele dose-dependent  
45 effects on stemness in human pluripotent stem cells (hPSCs). In the present study, we combine high-depth  
46 transcriptomics, total proteomics and reverse-phase protein arrays to reveal potentially disease-related  
47 alterations in heterozygous cells, and to assess the contribution of activated TGFβ signalling to the stemness  
48 phenotype of *PIK3CA*<sup>H1047R</sup> homozygous cells. We demonstrate signalling rewiring as a function of oncogenic  
49 PI3K signalling dose, and provide experimental evidence that self-sustained stemness is causally related to  
50 enhanced autocrine NODAL/TGFβ signalling. A significant transcriptomic signature of TGFβ pathway activation  
51 in *PIK3CA*<sup>H1047R</sup> heterozygous was observed but was modest and was not associated with the stemness  
52 phenotype seen in homozygous mutants. Notably, the stemness gene expression in *PIK3CA*<sup>H1047R</sup>  
53 homozygous iPSCs was reversed by pharmacological inhibition of TGFβ signalling, but not by pharmacological  
54 PI3Kα pathway inhibition. Altogether, this provides the first in-depth analysis of PI3K signalling in human  
55 pluripotent stem cells and directly links dose-dependent PI3K activation to developmental NODAL/TGFβ  
56 signalling.  
57

## 58 Introduction

59 Class IA phosphoinositide 3-kinases (PI3Ks) are evolutionarily conserved enzymes that catalyse  
60 formation of the membrane-bound second messenger phosphatidylinositol-3,4,5-trisphosphate (PIP<sub>3</sub>). PI3Ks  
61 are activated downstream of receptor tyrosine kinases, with the ensuing increase in PIP<sub>3</sub> and its derivative  
62 PI(3,4)P<sub>2</sub> triggering a widespread signalling network, best known for the activation of the serine/threonine  
63 kinases AKT and mTORC1. PI3K activation promotes cell survival, glucose uptake, anabolic metabolism, cell  
64 proliferation and cell migration (1). Among the class IA PI3K isoforms (PI3K $\alpha$ , PI3K $\beta$ , PI3K $\delta$ ), the ubiquitously-  
65 expressed PI3K $\alpha$  (encoded by the *PIK3CA* gene in humans), is the main regulator of organismal growth,  
66 development and survival (2).

67 Activating mutations in *PIK3CA* are among the most common somatic point mutations in cancer,  
68 together with inactivation or loss of the tumour suppressor *PTEN* (a negative regulator of PI3K) (3–5). The same  
69 mutations in *PIK3CA*, when acquired postzygotically during development, also cause a range of largely benign  
70 overgrowth disorders, for which the term *PIK3CA*-related overgrowth spectrum (PROS) has been coined (6).  
71 Motivated by the need to understand the role of PI3K signalling in a human developmental context, we  
72 previously generated an allelic series of human induced pluripotent stem cells (iPSCs) with heterozygous or  
73 homozygous expression of the activating mutation *PIK3CA*<sup>H1047R</sup>, the most commonly observed *PIK3CA*  
74 mutation in both cancer and PROS (7). Despite the severe developmental disorders caused by heterozygosity  
75 for *PIK3CA*<sup>H1047R</sup> in humans *in vivo*, we found little discernible effect on germ layer specification from  
76 heterozygous iPSCs. In sharp contrast, homozygosity for *PIK3CA*<sup>H1047R</sup> led to self-sustained stemness and  
77 resistance to spontaneous differentiation *in vitro* and *in vivo* (7). This suggested a previously unappreciated  
78 quantitative relationship between the strength of PI3K signalling and the gene regulatory network (GRN) in  
79 pluripotent stem cells.

80 The core pluripotency GRN features a feedforward, autoregulatory circuit comprising three  
81 transcription factors, namely SRY box 2 (SOX2), Octamer-binding transcription factor 3/4 (OCT3/4; encoded  
82 by POU5F1), and the homeobox transcription factor NANOG (8–10). SOX2 helps sustain OCT3/4 expression,  
83 which is required for establishment and maintenance of the pluripotent state (11). However, even modest  
84 overexpression of OCT3/4 destabilises the pluripotency network and triggers differentiation (12, 13). In contrast,  
85 NANOG, while dispensable for maintenance of pluripotency (14), stabilises the pluripotency gene regulatory  
86 network. Overexpression of NANOG by as little as 1.5-fold leads to sustained self-renewal (or “stemness”) of  
87 murine and human PSCs (15–18). In hPSCs, NANOG expression is activated by the transcription factors  
88 SMAD2/3 (19), which in turn are activated by receptors binding TGF $\beta$ , Activin or NODAL (20). Overexpression  
89 of NODAL thus results in self-sustained stemness of hPSCs even in differentiation-promoting conditions (21,  
90 22).

91 Given the unexpected and surprisingly mild phenotype caused by heterozygous *PIK3CA*<sup>H1047R</sup>  
92 expression in iPSCs, we reasoned that more sensitive assays would allow us to discern small but disease-  
93 relevant alterations in these cells. Thus, in this study, we first applied high depth transcriptomics, and proteomics  
94 to seek evidence of disease-related phenotypes in heterozygous cells, and to investigate how high-dose PI3K  
95 signalling leads to self-sustained stemness in homozygous *PIK3CA*<sup>H1047R</sup> iPSCs. We demonstrate that  
96 heterozygous cells do exhibit significant transcriptomic changes, although these are a weak echo of the  
97 widespread changes seen in homozygous cells. The mild transcriptional consequences of heterozygous  
98 expression of disease-relevant *PIK3CA* mutations were also validated in additional model systems and contrast  
99 with previous findings of major transcriptional rewiring in immortalised, non-transformed breast epithelial cells  
100 (23, 24). We demonstrate that the stemness phenotype of *PIK3CA*<sup>H1047R/H1047R</sup> iPSCs is maintained by self-  
101 sustained NODAL/TGF $\beta$  signalling, in line with increased *PIK3CA*-mediated *NODAL* expression, and that it is  
102 not reversible by PI3K $\alpha$ -specific inhibition. This work provides the first in-depth characterisation of dose-  
103 dependent PI3K signalling effects in hPSCs and establishes dose-dependent PI3K $\alpha$ -induced NODAL/TGF $\beta$   
104 signalling as the main mechanism for self-sustained stemness in homozygous *PIK3CA*<sup>H1047R</sup> iPSCs. We  
105 discuss the implications of our findings for understanding developmental disorders and cancers driven by  
106 genetic PI3K activation.

## 107 Results

### 108 A sharp PI3K activity threshold determines gene expression changes in *PIK3CA*<sup>H1047R</sup> iPSCs

109 We previously generated isogenic human iPSCs with heterozygous or homozygous knock-in of the  
110 “hotspot”  $PIK3CA^{H1047R}$  mutation. Surprisingly, heterozygous cells showed few phenotypic changes and  
111 differentially expressed protein-coding transcripts. In contrast, homozygous  $PIK3CA^{H1047R/H1047R}$  cells exhibited  
112 marked morphological changes and altered gene expression, with strong enrichment for cancer-associated  
113 pathways (7).

114 To substantiate the apparent PI3K activity threshold manifest in  $PIK3CA^{H1047R}$ -driven gene  
115 expression changes, and to look for further disease-related changes in heterozygous cells, we undertook RNA  
116 sequencing at substantially greater depth, also increasing the sample size to four independently-derived,  
117 previously unstudied iPSC cultures for each  $PIK3CA$  genotype. As before, homozygous mutant cells clearly  
118 separated from heterozygous and wild-type cells, which overlapped on multidimensional scaling (Fig. 1A), but  
119 we now detected a reduction in the levels of 451 transcripts and an increase in the levels of 710 transcripts in  
120  $PIK3CA^{WT/H1047R}$  iPSCs (Fig. 1B). This dropped to 149 and 343 transcripts, respectively, after applying a fold-  
121 change cut-off of 1.3 (Fig. 1B and Dataset S1), indicative of the small magnitude of many expression changes  
122 in heterozygous mutants (Fig. S1A). Use of the same cut-off of 1.3, in sharp distinction, yielded 2873 and 2771  
123 transcripts of decreased or increased abundance, respectively, in homozygous iPSC mutants (Fig. 1B and  
124 Dataset S2). Not only was the number of gene expression changes higher by an order of magnitude in  
125 homozygous cells, but many expression changes were large compared to wild-type controls (Fig. S1A). The  
126 magnitudes of gene expression changes in  $PIK3CA^{H1047R/H1047R}$  cells correlated strongly with our previous  
127 findings (Spearman’s rho = 0.74,  $p < 2e-16$ ) (Fig. S1B), whereas correlation was low (Spearman’s rho = 0.1,  $p$   
128  $< 2e-16$ ) for  $PIK3CA^{WT/H1047R}$  iPSCs (Fig. S1C).

129 Given prior reports that  $PIK3CA^{H1047R}$  heterozygosity in breast epithelial cells extensively remodels  
130 gene expression (23, 24), we undertook further transcriptional profiling in two unrelated cellular models of  
131 genetic  $PIK3CA$  activation. First, we examined iPSCs derived from a woman with clinically obvious but mild  
132 PROS due to mosaicism for  $PIK3CA^{E418K}$  (Fig. 1C) (25). Heterozygous iPSCs were compared to wild-type lines  
133 established simultaneously from dermal fibroblasts from the same skin biopsy, which is possible due to genetic  
134 mosaicism of the sampled skin. Like  $PIK3CA^{WT/H1047R}$  iPSCs,  $PIK3CA^{WT/E418K}$  iPSCs closely clustered with  
135 isogenic wild-type controls on multidimensional scaling (MDS) plotting (Fig. 1D), with only 30 differentially  
136 expressed genes (Dataset S3). We also studied previously reported  $Pik3ca^{WT/H1047R}$  mouse embryonic  
137 fibroblasts (MEFs) 48 h after Cre-mediated  $Pik3ca^{H1047R}$  induction (26). Wild-type and  $Pik3ca^{WT/H1047R}$  MEFs  
138 were superimposable on an MDS plot (Fig. 1E), with only 192 downregulated and 77 upregulated genes  
139 (Dataset S4). Our findings suggest that there are *bona fide* transcriptional changes induced by heterozygosity  
140 for  $PIK3CA^{H1047R}$ , but these are dramatically smaller in number and magnitude than changes induced by  
141 homozygosity for  $PIK3CA^{H1047R}$ .

142 To assess whether transcriptional changes observed in iPSCs were mirrored in the proteome, we  
143 applied label-free proteomics to the iPSC lines used in our previous study (7). Around 4,600 protein ratios were  
144 obtained for both heterozygous *versus* wild-type and homozygous *versus* wild-type iPSC comparisons, as  
145 estimated using a novel Bayesian approach based on the Markov Chain Monte Carlo (MCMC) method (27).  
146 In contrast to other algorithms, the MCMC method generates an error estimate alongside each protein  
147 concentration which permits more confident determination of proteins with the most robust differential  
148 expression. The number of differentially-expressed proteins correlated with  $PIK3CA^{H1047R}$  allele dosage, with 54  
149 and 258 differentially expressed proteins in  $PIK3CA^{WT/H1047R}$  and  $PIK3CA^{H1047R/H1047R}$  cells, respectively (Fig. 1F,  
150 Datasets S5 and S6). Of these, 27 proteins were differentially expressed in both heterozygous and  
151 homozygous  $PIK3CA^{H1047R}$  iPSCs (Dataset S7), with 16 changing in opposite directions (Fig. 1F). There was  
152 a strong correlation between differentially-expressed proteins and corresponding transcripts in  
153  $PIK3CA^{H1047R/H1047R}$  iPSCs (Fig. S2A, S2B), but not in heterozygous mutants (Fig. S2C, S2D). As for the  
154 relatively weak correlation seen between transcriptomic experiments for heterozygous cells, this likely reflects  
155 the small magnitude of gene expression changes induced by heterozygous  $PIK3CA^{H1047R}$  (Fig. 1B, S1C).

156 Collectively, these findings corroborate the existence of a threshold of PI3K pathway activity which  
157 determines the large majority of gene expression changes in  $PIK3CA^{H1047R/H1047R}$  iPSCs in a near-binary  
158 manner. While deeper sequencing did reveal statistically significant gene expression changes in heterozygous  
159 iPSCs, and while these changes may contribute to growth-related phenotypes in PROS when sustained across  
160 development, effect sizes were modest and more variable. Similar findings in heterozygous MEFs suggest that  
161 this may be generalisable to differentiated cell types, irrespective of species. This consolidates the view that only  
162 homozygosity for  $PIK3CA^{H1047R}$  results in robust and widespread transcriptional changes in otherwise normal,

163 diploid cells, arguing against a universal “butterfly” effect of heterozygosity suggested based on studies of a  
164 genetically abnormal breast epithelial cell line (23, 24).

### 165 ***PIK3CA*<sup>H1047R/H1047R</sup> iPSCs show evidence of signalling “rewiring”**

167 We previously demonstrated a graded increase in AKT (S473) phosphorylation across heterozygous  
168 and homozygous *PIK3CA*<sup>H1047R</sup> iPSCs (7). To assess in more detail whether the near-binary gene expression  
169 difference between heterozygous and homozygous *PIK3CA*<sup>H1047R</sup> cells is underpinned by corresponding  
170 differences in indices of PI3K pathway activation, we profiled phosphorylation of a wider repertoire of pathway  
171 components using reverse phase phosphoprotein array (RPPA) technology.

172 Changes in protein phosphorylation were surprisingly modest, with the largest change a two-fold  
173 increase in AKT phosphorylation (on S473 and T308) in *PIK3CA*<sup>H1047R/H1047R</sup> cells. Contrasting with the near-  
174 binary response seen at the transcriptional level, heterozygous and homozygous *PIK3CA*<sup>H1047R</sup> expression  
175 generally produced graded phosphorylation of PI3K pathway components, with slightly higher levels in  
176 homozygous iPSCs (Fig. 2A). None of the mutant genotypes showed consistently increased phosphorylation  
177 of the mTORC1 target P70S6K or its downstream substrate S6 (Fig. S3A), perhaps reflecting saturation at this  
178 level of the pathway due to other stimuli for mTORC1 in the complete culture medium (e.g. amino acids) (28).  
179 When deprived of growth factors for 1 h prior to RPPA profiling, both heterozygous and homozygous mutant  
180 did exhibit increased P70S6K phosphorylation, whereas S6 phosphorylation remained similar to wild-type cells  
181 (Fig. 2B).

182 Inhibition of PI3K $\alpha$  activity with the PI3K $\alpha$ -selective inhibitor BYL719 for 24 h fully reversed canonical  
183 PI3K signalling-related changes in phosphorylation of downstream proteins including AKT, GSK3, FOXO1,  
184 TSC2 and P70S6K (Fig. 2B). Consistent with these signalling changes, we previously showed that the same  
185 dose of BYL719 (100 nM) abolishes the increased tolerance to growth factor deprivation-induced death  
186 conferred by heterozygous or homozygous *PIK3CA*<sup>H1047R</sup> in iPSCs (7). Despite its effects on the primary PI3K  
187 signalling cascade, PI3K $\alpha$  inhibition failed to reverse other changes observed in *PIK3CA*<sup>H1047R/H1047R</sup> iPSCs,  
188 including increased phosphorylation of SMAD2 and ERK1/2 and increased expression of c-MYC and IGF1R  
189 (Fig. 2B, Fig. S3B). This suggests signalling rewiring in *PIK3CA*<sup>H1047R/H1047R</sup> iPSCs that is partially resistant to  
190 relatively short-term inhibition of the inducing stimulus.

### 191 **Pathway and network analyses implicate TGF $\beta$ signalling in *PIK3CA*<sup>H1047R</sup> dose-dependent stemness**

193 Pathway and network analyses were next applied to proteomic and transcriptomic data to identify  
194 candidate mechanism(s) mediating *PIK3CA*<sup>H1047R</sup> dose-dependent stemness. Consistent with our previous  
195 study (7), TGF $\beta$ 1 was again the most significant predicted upstream activator according to Ingenuity<sup>®</sup> Pathway  
196 Analysis (IPA) of the top 2000 upregulated and top 2000 downregulated transcripts in *PIK3CA*<sup>H1047R/H1047R</sup>  
197 iPSCs (Fig. 3A). TGF $\beta$ 1 was also the most significant upstream activator predicted by analysis of  
198 *PIK3CA*<sup>H1047R/H1047R</sup> proteomic data (Fig. 3B). This strongly suggests activation of the TGF $\beta$  pathway in  
199 homozygous *PIK3CA*<sup>H1047R</sup> iPSCs.

200 Although *PIK3CA*<sup>WT/H1047R</sup> iPSCs showed around 10-fold fewer differentially expressed genes than  
201 homozygous iPSC cells, IPA in heterozygous iPSCs also revealed multiple TGF $\beta$  pathway-related stimuli  
202 among predicted upstream activators (Fig. 3C). Moreover, TGF $\beta$ 1 was predicted as one of only two significant  
203 upstream activators when analysis was performed on genes concordantly differentially expressed (N = 180) in  
204 *PIK3CA*<sup>H1047R</sup> mutant iPSCs versus wild-type controls (Fig. 3C and Dataset S8).

205 The other significant upstream regulator common to heterozygous and homozygous *PIK3CA*<sup>H1047R</sup> was  
206 MAPK1 (also known as ERK2), consistent with RPPA findings and immunoblot evidence of increased ERK  
207 kinase phosphorylation in *PIK3CA*<sup>H1047R</sup> mutant iPSCs (Ref. (7), Fig. 2A and Fig. S3A). The significance of  
208 predicted TGF $\beta$  activation in heterozygous *PIK3CA*<sup>H1047R</sup> iPSCs (overlap p-value = 1.7e-05) was much lower  
209 than in homozygous (overlap p-value = 4.3e-21) mutants. This points towards a critical role for the TGF $\beta$   
210 pathway in mediating the allele dose-dependent effect of *PIK3CA*<sup>H1047R</sup> in human iPSCs.

211 To complement IPA analysis, which is based on highly curated, proprietary datasets, we undertook non-  
212 hypothesis-based Weighted Gene Correlation Network Analysis (WGCNA) – a network-based data reduction  
213 method that seeks to determine gene correlation patterns across multiple samples, irrespective of the function  
214 of individual genes (29). Using all transcripts expressed in wild-type, heterozygous and homozygous  
215 *PIK3CA*<sup>H1047R</sup> iPSCs (Fig. 4A), this analysis returned 43 modules (or clusters) of highly interconnected genes

216 (Fig. 4B). Of the two modules with the highest correlation with the homozygous trait, one showed enrichment  
217 for several KEGG pathway terms relevant to stemness of *PIK3CA*<sup>H1047R/H1047R</sup> iPSCs, notably including  
218 “Signalling pathways regulating pluripotency in stem cells” (Fig. 4C).

219 Given prior evidence of strong activation of TGFβ signalling in homozygous mutant cells, we next  
220 constructed the minimal network of differentially expressed genes in *PIK3CA*<sup>H1047R/H1047R</sup> iPSCs that linked  
221 pluripotency, PI3K and TGFβ signalling pathways (Fig. 4D). This approach allowed us to navigate the signalling  
222 rewiring and to link strong PI3K pathway activation, stemness and TGFβ signalling in an unbiased manner.  
223 Indeed, the resulting network exhibited high interconnectivity, with multiple shared nodes across all three  
224 pathways, suggesting close crosstalk between PI3K and TGFβ signalling in stemness regulation. That most  
225 nodes represented genes with increased expression in homozygous mutants strengthens the notion that strong  
226 oncogenic PI3Kα activation stabilises the pluripotency network in human iPSCs. The MYC oncogene stood out  
227 as the only network node intersecting with all three signalling pathways, suggesting it may comprise a key  
228 mechanistic link in the observed phenotype.

### 230 Inhibition of TGFβ signalling destabilises the pluripotency gene network in *PIK3CA*<sup>H1047R/H1047R</sup> iPSCs

231 TGFβ signalling plays a critical role in pluripotency regulation (19, 22, 30), and a differentiation-resistant  
232 phenotype has been reported in *NODAL*-overexpressing iPSCs (21). Together with increased *NODAL*  
233 expression in homozygous *PIK3CA*<sup>H1047R</sup> iPSCs and computational identification of enhanced TGFβ pathway  
234 activity in PI3K-driven “constitutive” stemness (Ref. (7) and current study), this led us to hypothesise that strong  
235 PI3Kα-dependent induction of *NODAL* underlies establishment of the differentiation-resistant phenotype of  
236 homozygous *PIK3CA*<sup>H1047R</sup> iPSCs. Specifically, we hypothesised that autocrine *NODAL* enhances TGFβ  
237 signalling in *PIK3CA*<sup>H1047R/H1047R</sup> iPSCs, with resulting increased *NANOG* expression “locking” the cells in  
238 perpetual stemness (19).

239 Testing this hypothesis in iPSCs is challenging for biological and technical reasons, including lack of  
240 specific pharmacological inhibitors of *NODAL*, and difficulty in detecting subtle early phenotypic consequences  
241 of partial destabilisation of the iPSC pluripotency gene regulatory network. Moreover, the widely adopted  
242 maintenance medium and coating substrate we used for cell culture both contain TGFβ ligands (31, 32), which  
243 may mask effects of *NODAL* repression by PI3Kα-specific inhibition. We previously found that treatment of  
244 *PIK3CA*<sup>H1047R/H1047R</sup> iPSCs in this ‘complete’ maintenance medium with 500 nM BYL719 reduces *NODAL*  
245 mRNA expression within 24 h, but has no discernible effect on increased *NANOG* mRNA levels (7).

246 To minimise confounding effects of exogenous TGFβ ligands, we prepared medium with and without  
247 recombinant *NODAL* supplementation, and assessed expression of *NODAL* and *NANOG* as surrogate  
248 markers of stemness over 72 h of culture. We also reduced the BYL719 concentration to 250 nM given  
249 increased iPSC toxicity observed with 500 nM BYL719 (7); and pilot experiments (not shown) in which 24 h  
250 treatment with 250 nM but not 100 nM BYL719 in complete medium reduced *NODAL* mRNA expression in  
251 *PIK3CA*<sup>H1047R/H1047R</sup> iPSC clones. Within 48 h, exclusion of *NODAL* from the medium resulted in the expected  
252 downregulation of *NODAL* and *NANOG* expression in wild-type iPSCs, and this was greater still at 72 h (Fig. 5  
253 and Fig. S4A). In *PIK3CA*<sup>H1047R/H1047R</sup> iPSCs, however, *NODAL* removal had no effect on the increased *NODAL*  
254 and *NANOG* expression (Fig. 5 and Fig. S4A), in line with a self-sustained stemness phenotype. Exposure of  
255 *NODAL*-free *PIK3CA*<sup>H1047R/H1047R</sup> cultures to 250 nM BYL719 had a visible colony growth-inhibitory effect (Fig.  
256 S5) and decreased *NODAL* expression within 24 h, and this continued to decrease subsequently (Fig. 5). This  
257 is consistent with *NODAL*’s known ability to control its own expression through a feed-forward loop (33). Despite  
258 a 55% reduction in *NODAL* mRNA after 72 h, however, little effect on *NANOG* expression was seen (Fig. 5).  
259 This may reflect the short time course studied (to avoid confounding effect of passaging), or the exquisite  
260 sensitivity of iPSCs to residual upregulation of *NODAL* in homozygous *PIK3CA*<sup>H1047R</sup> iPSCs. This may be  
261 compounded by residual low levels of TGFβ-like ligands in the coating substrate, or possibly by increased  
262 expression of two other TGFβ superfamily ligands, *GDF3* and *TGFB2*, observed in homozygous mutant cells  
263 (Dataset S2).

264 To confirm that TGFβ signalling is required for maintenance of stemness in *PIK3CA*<sup>H1047R/H1047R</sup> iPSCs,  
265 the cells were treated with SB431542 – a specific inhibitor of TGFβ and *NODAL* type I receptors (34). This  
266 completely repressed *NODAL* expression within 24 h, accompanied by downregulation of *NANOG* expression  
267 (Fig. 5). A similar effect was observed on *POU5F1* expression, consistent with destabilisation of the pluripotency

268 gene regulatory network in *PIK3CA*<sup>H1047R/H1047R</sup> iPSCs (Fig. 5). Confirming this, we used a lineage-specific gene  
269 expression array to demonstrate similar reduction in expression of several other well-established stemness  
270 markers (*MYC*, *FGF4*, *GDF3*) with increased expression in *PIK3CA*<sup>H1047R/H1047R</sup> iPSCs, performing the analysis  
271 after 48 h of TGFβ pathway inhibition (Fig. S4B). Despite the short treatment, we found evidence for the  
272 expected neuroectoderm induction upon inhibition of the TGFβ pathway (21, 35), reflected by increased  
273 expression of *CDH9*, *MAP2*, *OLFM3* and *PAPLN* (Fig. S4B).

274 Collectively, these data suggest that the stemness phenotype of *PIK3CA*<sup>H1047R/H1047R</sup> iPSCs is  
275 mediated by self-sustained TGFβ signalling, most likely through PI3K dose-dependent increase in *NODAL*  
276 expression, and that this is amenable to reversal through inhibition of the TGFβ pathway but not of PI3Kα itself.  
277

## 278 Discussion

279 *PIK3CA*<sup>H1047R</sup> is the most common activating *PIK3CA* mutation in human cancers and in PROS (6).  
280 We recently found that *PIK3CA*-associated cancers often harbour multiple mutated *PIK3CA* copies, and  
281 demonstrated that homozygosity but not heterozygosity for *PIK3CA*<sup>H1047R</sup> leads to self-sustained stemness in  
282 human pluripotent stem cells (hPSCs) (7). High-depth transcriptomics in this study confirmed that  
283 heterozygosity for *PIK3CA*<sup>H1047R</sup> induces significant but very modest transcriptional changes; observed both in  
284 CRISPR-edited hPSCs with long-term *PIK3CA*<sup>H1047R</sup> expression and in mouse embryonic fibroblasts (MEFs)  
285 upon acute *PIK3CA*<sup>H1047R</sup> induction by *Cre*, with canonical PI3K pathway activation seen in both cases (current  
286 study and Ref. (7, 26, 36)). Similarly, hPSCs with heterozygous expression of *PIK3CA*<sup>E418K</sup>, a “non-hotspot”  
287 mutation, were transcriptionally indistinguishable from their isogenic wild-type controls. In contrast to the mild  
288 transcriptional consequences of these heterozygous variants, however, homozygosity for *PIK3CA*<sup>H1047R</sup> was  
289 associated with differential expression of nearly a third of the hPSC transcriptome, suggesting widespread  
290 epigenetic reprogramming. This near-binary response is not a consequence of a similar quantitative difference  
291 in PI3K pathway activation, as assessed by phosphoprotein profiling, which instead showed a relatively modest  
292 and graded increase in homozygous versus heterozygous *PIK3CA*<sup>H1047R</sup> hPSCs. This implies that the apparent  
293 sharp PI3K signalling threshold that determines the cellular response in hPSCs is “decoded” distal to the  
294 canonical pathway activation.

295 Using a combination of computational analyses and targeted experiments, the current study further  
296 provides evidence for self-sustained TGFβ pathway activation as the main mechanism through which  
297 *PIK3CA*<sup>H1047R</sup> homozygosity “locks” hPSCs in a differentiation-resistant state that has become independent of  
298 the driver mutation and the associated PI3K pathway activation. We suggest that homozygosity but not  
299 heterozygosity for *PIK3CA*<sup>H1047R</sup> promotes sufficient TGFβ pathway activity to induce increased *NODAL* and  
300 downstream *NANOG* expression to levels that stabilise the stem cell state, yet are not high enough to tip the  
301 balance towards mesendoderm differentiation (7). Exactly how PI3K activation regulates *NODAL* expression  
302 remains unknown. A potential mechanism involves increased expression of the stem cell reprogramming factor  
303 *MYC*, which was observed at both mRNA and protein level in homozygous but not heterozygous *PIK3CA*<sup>H1047R</sup>  
304 iPSCs. Furthermore, *MYC* was the only node in the WGCNA-based network of pluripotency, PI3K and TGFβ  
305 pathway components that was shared by all three pathways (Fig. 4D). *MYC* has previously been shown to  
306 exert oncogenic effects that depend on a sharp threshold of *MYC* expression, reminiscent of the effects we  
307 observe for dose-dependent *PIK3CA* activation (37). Elevated *MYC* has also been shown to allow  
308 *PIK3CA*<sup>H1047R</sup>-induced murine breast cancers to become independent of continuous *PIK3CA*<sup>H1047R</sup> expression  
309 (38).

310 Stabilisation of the stemness phenotype in hPSCs by strong genetic PI3K pathway activation may  
311 be generalisable beyond the iPSC model system. BYL719 (alpelisib; Novartis), the PI3Kα-selective inhibitor  
312 used in our cellular studies, was recently approved for use in combination with anti-estrogen therapy in ER-  
313 positive breast cancers (39). In a separate study focusing on human breast cancer (Madsen *et al.*, manuscript  
314 submitted), we have described use of computational analyses to demonstrate a strong, positive relationship  
315 between a transcriptomically-derived PI3K activity score, stemness gene expression and tumour grade in  
316 breast cancer. Prior reports have suggested a role for *NODAL* in driving breast cancer stemness and  
317 aggressive disease (40, 41), with potential links to mTORC1 activation (42, 43). Our findings that BYL719 fails  
318 to fully reverse the increased *NODAL* and stemness gene expression in homozygous *PIK3CA*<sup>H1047R</sup> iPSCs  
319 suggests that inhibition of TGFβ signalling as a pro-differentiation therapy warrants investigation as co-therapy



320 with PI3K inhibitors in breast tumours with strong PI3K pathway activation. Finally, the lack of widespread  
321 transcriptional changes upon heterozygous expression of mutant *PIK3CA* in otherwise genetically normal cell  
322 models may explain the low oncogenicity of this genotype in isolation *in vivo*.  
323

## 324 **Materials and Methods**

325

326 All cell lines used in this study are listed in **Table S1**. Unless stated otherwise, standard chemicals  
327 were acquired from Sigma Aldrich, with details for the remaining reagents included in **Table S2**.

## 328 **iPSC culture and treatments**

### 329 *Maintenance*

330 The derivation of the iPSC lines, including associated ethics statements, has been  
331 described previously (7). All lines were grown at 37°C and 5% CO<sub>2</sub> in Essential 8 Flex (E8/F)  
332 medium on Geltrex-coated plates, in the absence of antibiotics. For maintenance, cells at 70-90%  
333 confluency were passaged as aggregates with ReLeSR, using E8 supplemented with RevitaCell  
334 (E8/F+R) during the first 24 h to promote survival. A detailed version of this protocol is available via  
335 protocols.io (doi: [dx.doi.org/10.17504/protocols.io.4rtgv6n](https://doi.org/10.17504/protocols.io.4rtgv6n)).

336 All cell lines were tested negative for mycoplasma and genotyped routinely to rule out  
337 cross-contamination during prolonged culture. Short tandem repeat profiling was not performed. All  
338 experiments were performed on cells within 10 passages since thawing.

339

### 340 *Collection for RNA sequencing and total proteomics*

341 For RNA sequencing and total proteomics, subconfluent cells were fed fresh E8/F 3 h prior to snap-  
342 freezing on dry ice and subsequent RNA or protein extraction. Relative to the results in Ref. (7),  
343 the current transcriptomic data of *PIK3CA*<sup>H1047R</sup> were obtained more than 6 months following the  
344 first study, with cells at different passages, and were thus independent from one another. Moreover,  
345 sample collection for the second transcriptomics experiment was conducted over three days  
346 according to a block design, thus allowing us to determine transcriptional differences that are robust  
347 to biological variability.

### 348 *Cell lysate collection for RPPA*

349 For RPPA in growth factor-replete conditions, cells were fed fresh E8/F 3h before  
350 collection. To assess variability due to differences in collection timing, clones from each iPSC  
351 genotype were collected on each one of three days according to a block design, giving rise to a  
352 total of 22 cultures. To test the effect of the PI3K $\alpha$ -specific inhibitor BYL719, cells were treated with  
353 100 nM drug (or DMSO only as control treatment) for 24 h and exposed to growth factor removal  
354 within the last hour before collection. All cells were washed in DPBS prior to collection to rinse off  
355 residual proteins and cell debris.

### 356 *TGF $\beta$ /NODAL signalling studies*

357 Wild-type or homozygous *PIK3CA*<sup>H1047R</sup> iPSCs were seeded in 12-well plates all coated  
358 with Geltrex from the same lot (#2052962; diluted in DMEM/F12 lot #RNBH0692). Cells were  
359 processed for seeding at a ratio of 1:15 according to the standard maintenance protocol. One day  
360 after seeding, individual treatments were applied to triplicate wells. Briefly, cells were first washed  
361 twice with 2 and 1 ml of Dulbecco's PBS (DPBS) to remove residual growth factors. The base  
362 medium for individual treatments was Essential 6 supplemented with 10 ng/ml heat-stable FGF2.

363 This was combined with one of the following reagents or their diluent equivalents: 100 ng/ml  
364 NODAL (diluent: 4 mM HCl), 250 nM BYL719 (diluent: DMSO), 5  $\mu$ M SB431542 (diluent: DMSO).  
365 Cells were snap-frozen on dry ice after 24, 48 and 72 h following a single DPBS wash. Individual  
366 treatments were replenished daily at the same time of day to limit temporal confounders.

### 367 **Mouse embryonic fibroblast (MEF) culture**

368 The derivation and culture of the wild-type and *PIK3CA*<sup>WT/H1047R</sup> MEFs used in this study  
369 have been reported previously (26). Cell pellets were collected on dry ice 48 h after induction of  
370 heterozygous *PIK3CA*<sup>H1047R</sup> expression, without prior starvation.

### 371 **RNA sequencing**

372 Induced pluripotent stem cell lysates were collected in QIAzol and processed for RNA  
373 extraction with the DirectZol Kit as per the manufacturer's instructions. The final RNA was subjected  
374 to quantification and quality assessment on an Agilent Bioanalyzer using the RNA 6000 Nano Kit,  
375 confirming that all samples had a RIN score of 10. For *PIK3CA*<sup>H1047R</sup> iPSCs and corresponding  
376 wild-types, an Illumina TruSeq Stranded mRNA Library Prep Kit was used to synthesise 150-bp-  
377 long paired-end mRNA libraries, followed by sequencing on an Illumina HiSeq 4000, with average  
378 depth of 70 million reads per sample. *PIK3CA*<sup>WT/E418K</sup> and isogenic control iPSCs were subjected  
379 to 50-bp-long single-end RNA sequencing (RNAseq) at an average depth of 20 million reads per  
380 sample.

381 MEF RNA was extracted using Qiagen's RNeasy miniprep (with QIAshredder). All  
382 samples had a confirmed Agilent Bioanalyzer RIN score of 10. An Illumina TruSeq Unstranded  
383 mRNA kit was used to prepare 100-bp-long paired-end libraries, followed by Illumina HiSeq 2000  
384 sequencing.

385 Details of the subsequent data analyses (raw read mapping, counting, statistical testing,  
386 pathway and network analyses) are provided in SI Appendix.

### 387 **Label-free total proteomics**

#### 388 *Sample preparation*

389 Cells were cultured to subconfluence in Geltrex-coated T175 flasks, and protein was  
390 harvested by lysis in 3 ml modified RIPA buffer (50 mM Tris-HCl pH 7.5, 150 mM NaCl, 1% NP-40,  
391 0.5% Na-deoxycholate, 1 mM EDTA) supplemented with phosphatase inhibitors (5 mM  $\beta$ -  
392 glycerophosphate, 5 mM NaF, 1 mM Na<sub>3</sub>VO<sub>4</sub>) and protease inhibitors (Roche cOmplete ULTRA  
393 Tablets, EDTA-free). The lysates were sonicated on ice (4x 10s bursts, amplitude = 60%; Bandelin  
394 Sonopuls HD2070 sonicator) and spun down for 20 min at 4300g. Ice-cold acetone was added to  
395 the supernatant to achieve a final concentration of 80% acetone, and protein was left to precipitate  
396 overnight at -20°C. Precipitated protein was pelleted by centrifugation at 2000g for 5 min and  
397 solubilised in 6 M urea, 2 M thiourea, 10 mM HEPES pH 8.0. Protein was quantified using the  
398 Bradford assay and 8 mg of each sample were reduced with 1 mM dithiothritol, alkylated with 5 mM  
399 chloroacetamide and digested with endopeptidase Lys-C (1:200 v/v) for 3 h. Samples were diluted  
400 to 1 mg/ml protein using 50 mM ammonium bicarbonate and incubated overnight with trypsin (1:200  
401 v/v). Digested samples were acidified and urea removed using SepPak C18 cartridges. Peptides  
402 were eluted, and an aliquot of 100  $\mu$ g set aside for total proteome analysis. The peptides were  
403 quantified using the Pierce quantitative colorimetric peptide assay. The equalised peptide amounts  
404 were lyophilised and resolubilised in 2% acetonitrile and 1% trifluoroacetic acid in order to achieve  
405 a final 2  $\mu$ g on-column peptide load.

#### 406 *Mass spectrometry (MS) data acquisition*

407 All spectra were acquired on an Orbitrap Fusion Tribrid mass spectrometer (Thermo Fisher  
408 Scientific) operated in data-dependent mode coupled to an EASY-nLC 1200 liquid chromatography  
409 pump (Thermo Fisher Scientific) and separated on a 50 cm reversed phase column (Thermo Fisher  
410 Scientific, PepMap RSLC C18, 2  $\mu$ M, 100A, 75  $\mu$ m x 50 cm). Proteome samples (non-enriched)  
411 were eluted over a linear gradient ranging from 0-11% acetonitrile over 70 min, 11-20% acetonitrile  
412 for 80 min, 21-30% acetonitrile for 50 min, 31-48% acetonitrile for 30 min, followed by 76%  
413 acetonitrile for the final 10 min with a flow rate of 250 nl/min.

414 Survey-full scan MS spectra were acquired in the Orbitrap at a resolution of 120,000 from  
415 m/z 350-2000, automated gain control (AGC) target of  $4 \times 10^5$  ions, and maximum injection time of  
416 20 ms. Precursors were filtered based on charge state ( $\geq 2$ ) and monoisotopic peak assignment,  
417 and dynamic exclusion was applied for 45s. A decision tree method allowed fragmentation for ion  
418 trap MS2 via electron transfer dissociation (ETD) or higher-energy collision dissociation (HCD),  
419 depending on charge state and m/z. Precursor ions were isolated with the quadrupole set to an  
420 isolation width of 1.6 m/z. MS2 spectra fragmented by ETD and HCD (35% collision energy) were  
421 acquired in the ion trap with an AGC target of  $1e4$ . Maximum injection time for HCD and ETD was  
422 80 ms for proteome samples.

423 Details of the subsequent data analyses (FASTA file generation, mass spectrometry  
424 searches) are provided in SI Appendix.

425

#### 426 **Reverse phase protein array (RPPA)**

427 For RPPA, snap-frozen cells were lysed in ice-cold protein lysis buffer containing: 50 mM  
428 HEPES, 150 mM NaCl, 1.5 mM MgCl<sub>2</sub>, 10% (v/v) glycerol, 1% (v/v) TritonX-100, 1 mM EGTA, 100  
429 mM NaF, 10 mM Na<sub>4</sub>P<sub>2</sub>O<sub>7</sub>, 2 mM Na<sub>3</sub>VO<sub>4</sub> (added fresh), 1X EDTA-free protease inhibitor tablet,  
430 1X PhosStop tablet. Protein concentrations were measured using BioRad's DC protein assay, and  
431 all concentrations were adjusted to 1 mg/ml with lysis buffer and 1X SDS sample buffer (10%  
432 glycerol, 2% SDS, 62.5 mM Tris-HCl pH 6.8) supplemented with 2.5%  $\beta$ -mercaptoethanol.

433 The protein lysates were processed for slide spotting and antibody incubations as  
434 described previously (44). Briefly, a four-point dilution series was prepared for each sample and  
435 printed in triplicate on single pad Avid nitrocellulose slides (Grace Biolabs) consisting of 8 arrays  
436 with 36x12 spots each. Next, slides were blocked and incubated in primary and secondary  
437 antibodies. The processed arrays were imaged using an Innopsys 710 slide scanner. Non-specific  
438 signals were determined for each slide by omitting primary antibody incubation step. For  
439 normalisation, sample loading on each array was determined by staining with Fast Green dye and  
440 recording the corresponding signal at 800 nm. Details for all primary and secondary RPPA  
441 antibodies are included in **Table S3**.

442 Details of all subsequent data analyses, including statistical testing, are provided in SI  
443 Appendix.

444

#### 445 **Reverse transcription-quantitative PCR (RT-qPCR)**

446 Cellular RNA was extracted as described above for RNA Sequencing, and 200 ng used for  
447 complementary DNA (cDNA) synthesis with Thermo Fisher's High-Capacity cDNA Reverse  
448 Transcription Kit. Subsequent SYBR Green-based qPCRs were performed on 2.5 ng total cDNA.  
449 TaqMan hPSC Scorecards (384-well) were used according to the manufacturer's instructions with  
450 minor modifications. Further details on protocol modifications and all data analysis steps are  
451 provided in SI Appendix.

#### 452 **Statistical analyses**

453 Bespoke statistical analyses are specified in the relevant sections above and in SI  
454 Appendix.

455

## 456 **Data and materials availability**

457 Raw data and bespoke RNotebooks containing guided scripts and plots are available via  
458 the Open Science Framework (doi: 10.17605/OSF.IO/MUERY). The original RNAseq data have  
459 been deposited to the Gene Expression Omnibus (GEO), under accession numbers: GSE134076  
460 (H1047R iPSC data), GSE138161 (E418K iPSC data), GSE135046 (MEF data). The mass  
461 spectrometry proteomics data have been deposited to the ProteomeXchange Consortium via the  
462 PRIDE (45) partner repository with the dataset identifier PXD014719 (password to be provided to  
463 reviewers before public release). Further information and requests for resources and reagents  
464 should be directed to and will be fulfilled by the corresponding authors, Ralitsa R. Madsen  
465 ([r.madsen@ucl.ac.uk](mailto:r.madsen@ucl.ac.uk)) or Robert K. Semple ([rsemple@ed.ac.uk](mailto:rsemple@ed.ac.uk)).

## 466 **Acknowledgements**

467 We thank Dominique McCormick and Ineke Luijten for help with RNA extraction and cDNA  
468 synthesis, Cornelia Gewert for technical support, and Marcella Ma, Brian Lam and Michelle Dietzen  
469 for technical support with RNA sequencing and genomics analyses, respectively. We thank Evelyn  
470 K. Lau for help with GEO upload of the MEF RNAseq data. We are grateful to Prof Siddharta  
471 Chandran and his group for iPSC culturing facilities and to Pamela Brown (SURF Biomolecular  
472 Core, University of Edinburgh) for access to qPCR facilities.

473

## 474 **Funding:**

475 R.R.M. and R.K.S. are supported by the Wellcome Trust (105371/Z/14/Z, 210752/Z/18/Z)  
476 and United Kingdom (UK) NIHR Cambridge Biomedical Research Centre, and R.R.M. by a Boak  
477 Student Award from Clare Hall. Work in the laboratory of B.V. is supported by Cancer Research  
478 UK (C23338/ A25722) and the UK NIHR University College London Hospitals Biomedical Research  
479 Centre. Metabolic Research Laboratories Core facilities are supported by the Medical Research  
480 Council Metabolic Diseases Unit (MC\_UU\_12012/5) and a Wellcome Major Award  
481 (208363/Z/17/Z). R.L. is funded by a Lundbeck Foundation Fellowship. K.G.M., N.O.C. and the  
482 University of Edinburgh RPPA facility is supported by a Cancer Research UK Centre award. O.M.R.  
483 and C.C. are supported by Cancer Research UK.

484

## 485 **Competing interests**

486 R.K.S. is a consultant for HotSpot Therapeutics (Boston, MA, USA). B.V. is a consultant  
487 for Karus Therapeutics (Oxford, UK), iOnctura (Geneva, Switzerland) and Venthera (Palo Alto, CA,  
488 USA) and has received speaker fees from Gilead Sciences (Foster City, US). N.O.C. is a director  
489 of Ther-IP Ltd (Edinburgh, UK) and founder, shareholder and advisor for PhenoTherapeutics Ltd  
490 (Edinburgh, UK) and a member of the advisory board and shareholder of Amplia Therapeutics Ltd  
491 (Melbourne, Australia).

492

## 493 References

- 494
- 495 1. D. A. Fruman, *et al.*, The PI3K Pathway in Human Disease. *Cell* **170**, 605–635 (2017).
  - 496 2. B. Bilanges, Y. Posor, B. Vanhaesebroeck, PI3K isoforms in cell signalling and vesicle
  - 497 trafficking. *Nat. Rev. Mol. Cell Biol.* **20**, 515–534 (2019).
  - 498 3. M. T. Chang, *et al.*, Identifying recurrent mutations in cancer reveals widespread lineage
  - 499 diversity and mutational specificity. *Nat. Biotechnol.* **34**, 155–163 (2015).
  - 500 4. P. J. Campbell, *et al.*, Pan-cancer analysis of whole genomes. *Nature* **578**, 82–93 (2020).
  - 501 5. F. Sanchez-Vega, *et al.*, Oncogenic Signaling Pathways in The Cancer Genome Atlas.
  - 502 *Cell* **173**, 321–337.e10 (2018).
  - 503 6. R. R. Madsen, B. Vanhaesebroeck, R. K. Semple, Cancer-Associated PIK3CA Mutations
  - 504 in Overgrowth Disorders. *Trends Mol. Med.* **24**, 856–870 (2018).
  - 505 7. R. R. Madsen, *et al.*, Oncogenic PIK3CA promotes cellular stemness in an allele dose-
  - 506 dependent manner. *Proc. Natl. Acad. Sci.* **116**, 8380–8389 (2019).
  - 507 8. M. Li, J. C. I. Belmonte, Ground rules of the pluripotency gene regulatory network. *Nat.*
  - 508 *Rev. Genet.* **18**, 180–191 (2017).
  - 509 9. L. Boyer, *et al.*, Core transcriptional regulatory circuitry in human embryonic stem cells.
  - 510 *Cell* **122**, 947–956 (2005).
  - 511 10. Y. H. Loh, *et al.*, The Oct4 and Nanog transcription network regulates pluripotency in
  - 512 mouse embryonic stem cells. *Nat. Genet.* **38**, 431–440 (2006).
  - 513 11. J. Nichols, *et al.*, Formation of pluripotent stem cells in the mammalian embryo depends
  - 514 on the POU transcription factor Oct4. *Cell* **95**, 379–391 (1998).
  - 515 12. H. Niwa, J. Miyazaki, A. G. Smith, Quantitative expression of Oct-3/4 defines
  - 516 differentiation, dedifferentiation or self-renewal of ES cells. *Nat. Genet.* **24**, 372–376
  - 517 (2000).
  - 518 13. A. Radziszheuskaya, *et al.*, A defined Oct4 level governs cell state transitions of
  - 519 pluripotency entry and differentiation into all embryonic lineages. *Nat. Cell Biol.* **15**, 579–
  - 520 590 (2013).
  - 521 14. I. Chambers, *et al.*, Nanog safeguards pluripotency and mediates germline development.
  - 522 *Nature* **450**, 1230–1234 (2007).
  - 523 15. N. Ivanova, *et al.*, Dissecting self-renewal in stem cells with RNA interference. *Nature* **442**,
  - 524 533–538 (2006).
  - 525 16. K. Mitsui, *et al.*, The Homeoprotein Nanog Is Required for Maintenance of Pluripotency in
  - 526 Mouse Epiblast and ES Cells. *Cell* **113**, 631–642 (2003).
  - 527 17. I. Chambers, *et al.*, Functional expression cloning of Nanog, a pluripotency sustaining
  - 528 factor in embryonic stem cells. *Cell* **113**, 643–655 (2003).
  - 529 18. H. Darr, Overexpression of NANOG in human ES cells enables feeder-free growth while
  - 530 inducing primitive ectoderm features. *Development* **133**, 1193–1201 (2006).
  - 531 19. R. H. Xu, *et al.*, NANOG is a Direct Target of TGF $\beta$ /Activin-Mediated SMAD Signaling in
  - 532 Human ESCs. *Cell Stem Cell* **3**, 196–206 (2008).
  - 533 20. S. Pauklin, L. Vallier, Activin/Nodal signalling in stem cells. *Development* **142**, 607–619
  - 534 (2015).
  - 535 21. L. Vallier, D. Reynolds, R. A. Pedersen, Nodal inhibits differentiation of human embryonic
  - 536 stem cells along the neuroectodermal default pathway. *Dev. Biol.* **275**, 403–421 (2004).
  - 537 22. L. Vallier, M. Alexander, R. A. Pedersen, Activin/Nodal and FGF pathways cooperate to
  - 538 maintain pluripotency of human embryonic stem cells. *J. Cell Sci.* **118**, 4495–4509 (2005).
  - 539 23. V. Y. Kiselev, *et al.*, Perturbations of PIP3 signalling trigger a global remodelling of mRNA
  - 540 landscape and reveal a transcriptional feedback loop. *Nucleic Acids Res.* **43**, 9663–79
  - 541 (2015).
  - 542 24. J. R. Hart, *et al.*, The butterfly effect in cancer: A single base mutation can remodel the
  - 543 cell. *Proc. Natl. Acad. Sci.* **112**, 1131–1136 (2015).
  - 544 25. V. E. R. Parker, *et al.*, Safety and efficacy of low-dose sirolimus in the PIK3CA-related
  - 545 overgrowth spectrum. *Genet. Med.* **21**, 1189–1198 (2019).
  - 546 26. L. S. Moniz, *et al.*, Phosphoproteomic comparison of Pik3ca and Pten signalling identifies

- 547 the nucleotidase NT5C as a novel AKT substrate. *Sci. Rep.* **7**, 39985 (2017).
- 548 27. X. Robin, *et al.*, Probability-based detection of phosphoproteomic uncertainty reveals rare  
549 signaling events driven by oncogenic kinase gene fusion. *bioRxiv*, 621961 (2019).
- 550 28. A. J. Valvezan, B. D. Manning, Molecular logic of mTORC1 signalling as a metabolic  
551 rheostat. *Nat. Metab.* (2019) <https://doi.org/10.1038/s42255-019-0038-7>.
- 552 29. P. Langfelder, S. Horvath, WGCNA: an R package for weighted correlation network  
553 analysis. *BMC Bioinformatics* **9**, 559 (2008).
- 554 30. D. Mesnard, M. Guzman-Ayala, D. B. Constam, Nodal specifies embryonic visceral  
555 endoderm and sustains pluripotent cells in the epiblast before overt axial patterning.  
556 *Development* **133**, 2497–505 (2006).
- 557 31. G. Chen, *et al.*, Chemically defined conditions for human iPSC derivation and culture. *Nat.*  
558 *Methods* **8**, 424–429 (2011).
- 559 32. S. Vukicevic, *et al.*, Identification of multiple active growth factors in basement membrane  
560 Matrigel suggests caution in interpretation of cellular activity related to extracellular matrix  
561 components. *Exp. Cell Res.* **202**, 1–8 (1992).
- 562 33. C. S. Hill, Spatial and temporal control of NODAL signaling. *Curr. Opin. Cell Biol.* **51**, 50–  
563 57 (2018).
- 564 34. G. J. Inman, *et al.*, SB-431542 is a potent and specific inhibitor of transforming growth  
565 factor-beta superfamily type I activin receptor-like kinase (ALK) receptors ALK4, ALK5,  
566 and ALK7. *Mol. Pharmacol.* **62**, 65–74 (2002).
- 567 35. L. Vallier, *et al.*, Activin/Nodal signalling maintains pluripotency by controlling Nanog  
568 expression. *Development* **136**, 1339–49 (2009).
- 569 36. I. M. Berenjeno, *et al.*, Oncogenic PIK3CA induces centrosome amplification and  
570 tolerance to genome doubling. *Nat. Commun.* **8**, 1773 (2017).
- 571 37. D. J. Murphy, *et al.*, Distinct Thresholds Govern Myc's Biological Output In Vivo. *Cancer*  
572 *Cell* **14**, 447–457 (2008).
- 573 38. P. Liu, *et al.*, Oncogenic PIK3CA-driven mammary tumors frequently recur via PI3K  
574 pathway-dependent and PI3K pathway-independent mechanisms. *Nat. Med.* **17**, 1116–  
575 1120 (2011).
- 576 39. F. André, *et al.*, Alpelisib for PIK3CA-mutated, hormone receptor-positive advanced breast  
577 cancer. *N. Engl. J. Med.* **380**, 1929–1940 (2019).
- 578 40. M. Bar-Eli, Back to the embryonic stage: Nodal as a biomarker for breast cancer  
579 progression. *Breast Cancer Res.* **14**, 105 (2012).
- 580 41. N. V. Margaryan, *et al.*, The stem cell phenotype of aggressive breast cancer cells.  
581 *Cancers (Basel)*. **11**, 1–11 (2019).
- 582 42. M. Jewer, *et al.*, Translational control of breast cancer plasticity. *Nat. Commun.* **11**, 2498  
583 (2020).
- 584 43. Y. Katsuno, *et al.*, Chronic TGF- $\beta$  exposure drives stabilized EMT, tumor stemness, and  
585 cancer drug resistance with vulnerability to bitopic mTOR inhibition. *Sci. Signal.* **12**,  
586 eaau8544 (2019).
- 587 44. K. G. Macleod, B. Serrels, N. O. Carragher, *Proteomics for Drug Discovery*, I. M. Lazar,  
588 M. Kontoyianni, A. C. Lazar, Eds. (Springer New York, 2017).
- 589 45. Y. Perez-Riverol, *et al.*, The PRIDE database and related tools and resources in 2019:  
590 Improving support for quantification data. *Nucleic Acids Res.* (2019)  
591 <https://doi.org/10.1093/nar/gky1106>.
- 592
- 593
- 594

595  
596  
597  
598

## Figures and Tables

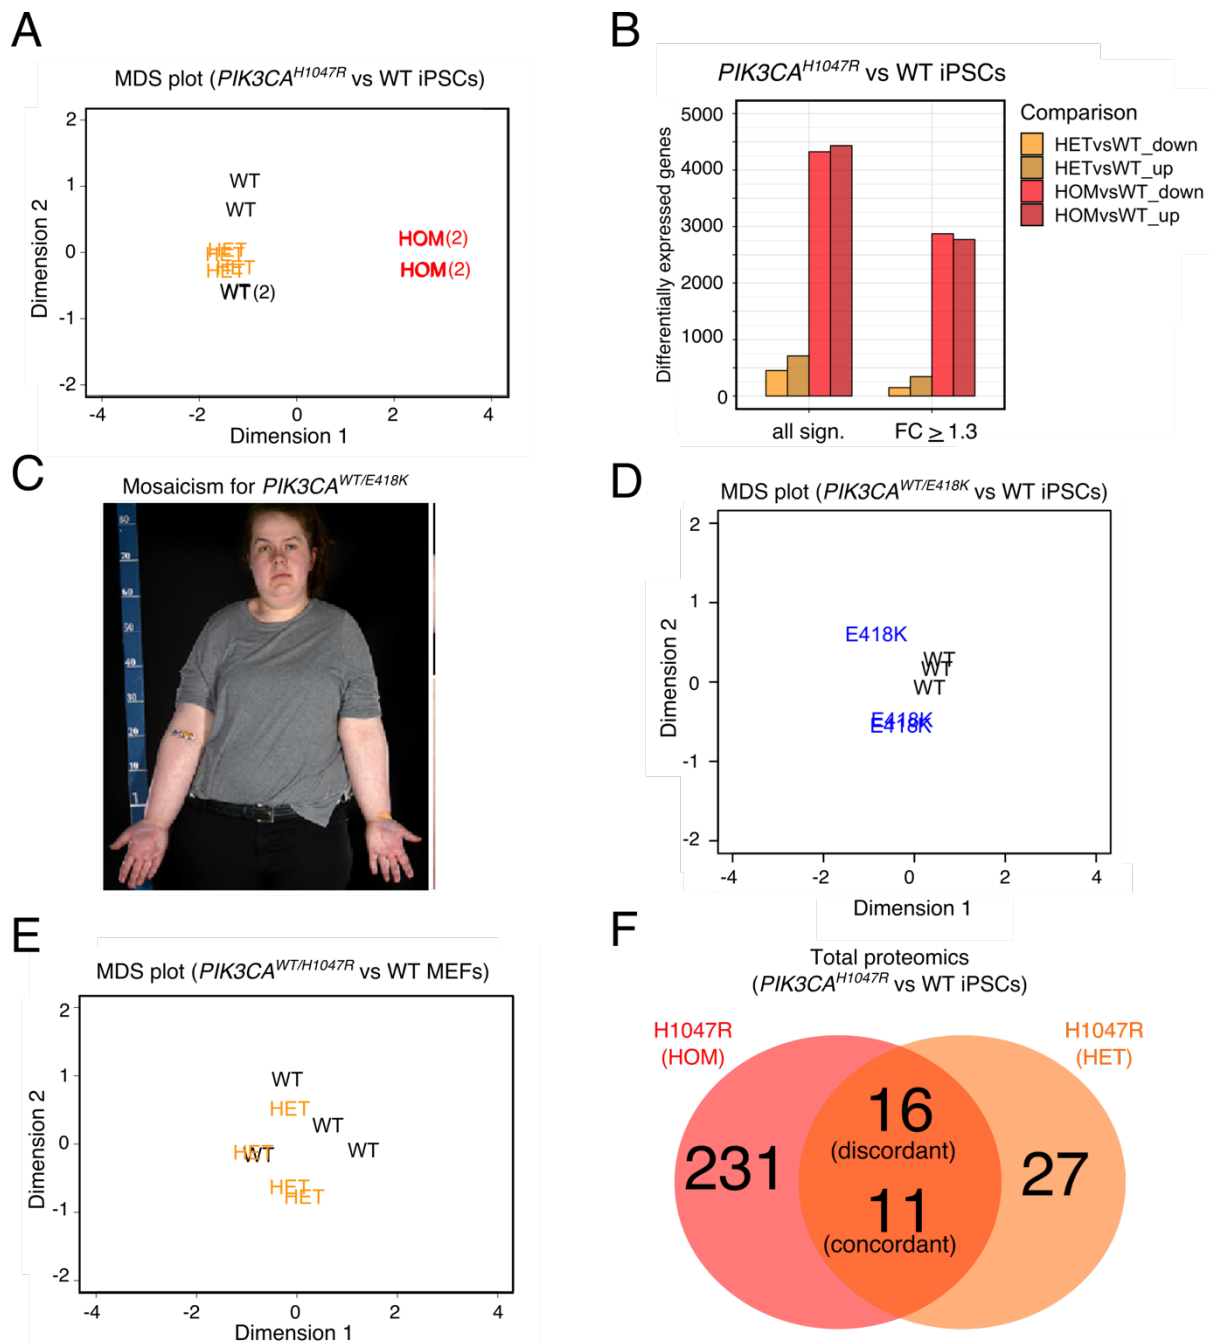

599  
600

601 **Figure 1. Transcriptomic and proteomic analyses of human and mouse cell lines with endogenous**  
602 **expression of oncogenic  $PIK3CA$ .** (A) Multidimensional scaling (MDS) plot of the transcriptomes of wild-type  
603 (WT),  $PIK3CA^{WT/H1047R}$  (HET) and  $PIK3CA^{H1047R/H1047R}$  (HOM) human iPSCs. The numbers in brackets indicate

604 the presence of two closely overlapping samples. **(B)** The number of differentially expressed genes in iPSCs  
605 heterozygous or homozygous for *PIK3CA*<sup>H1047R</sup> before and after application of an absolute fold-change cut-off  
606  $\geq 1.3$  (FDR  $\leq 0.05$ , Benjamini-Hochberg). The data are based on four iPSCs cultures from minimum two clones  
607 per genotype. See also Fig. S1. **(C)** Woman with asymmetric overgrowth caused by mosaicism for cells with  
608 heterozygous expression of *PIK3CA*<sup>E418K</sup>. Skin biopsies obtained from unaffected and affected tissues were  
609 used to obtain otherwise isogenic dermal fibroblasts for subsequent reprogramming into iPSCs. This image  
610 was reproduced from Ref. (25) **(D)** MDS plot of the transcriptomes of wild-type (WT) and *PIK3CA*<sup>WT/E418K</sup> iPSCs  
611 (based on 3 independent mutant clones and 3 wild-type cultures from 2 independent clones). **(E)** MDS plot of  
612 the transcriptomes of wild-type (WT) and *PIK3CA*<sup>WT/H1047R</sup> (HET) mouse embryonic fibroblasts (MEFs) following  
613 48 h of mutant induction (N = 4 independent clones per genotype). **(F)** Venn diagram showing the number of  
614 differentially expressed proteins in *PIK3CA*<sup>H1047R/H1047R</sup> (HOM) and *PIK3CA*<sup>WT/H1047R</sup> (HET) iPSCs relative to  
615 wild-type controls, profiled by label-free total proteomics on three clones per genotype. An absolute fold-change  
616 and z-score  $\geq 1.2$  were used to classify proteins as differentially expressed. The number of discordant and  
617 concordant changes in the expression of total proteins detected in both comparisons are indicated. See also  
618 Fig. S2.

619



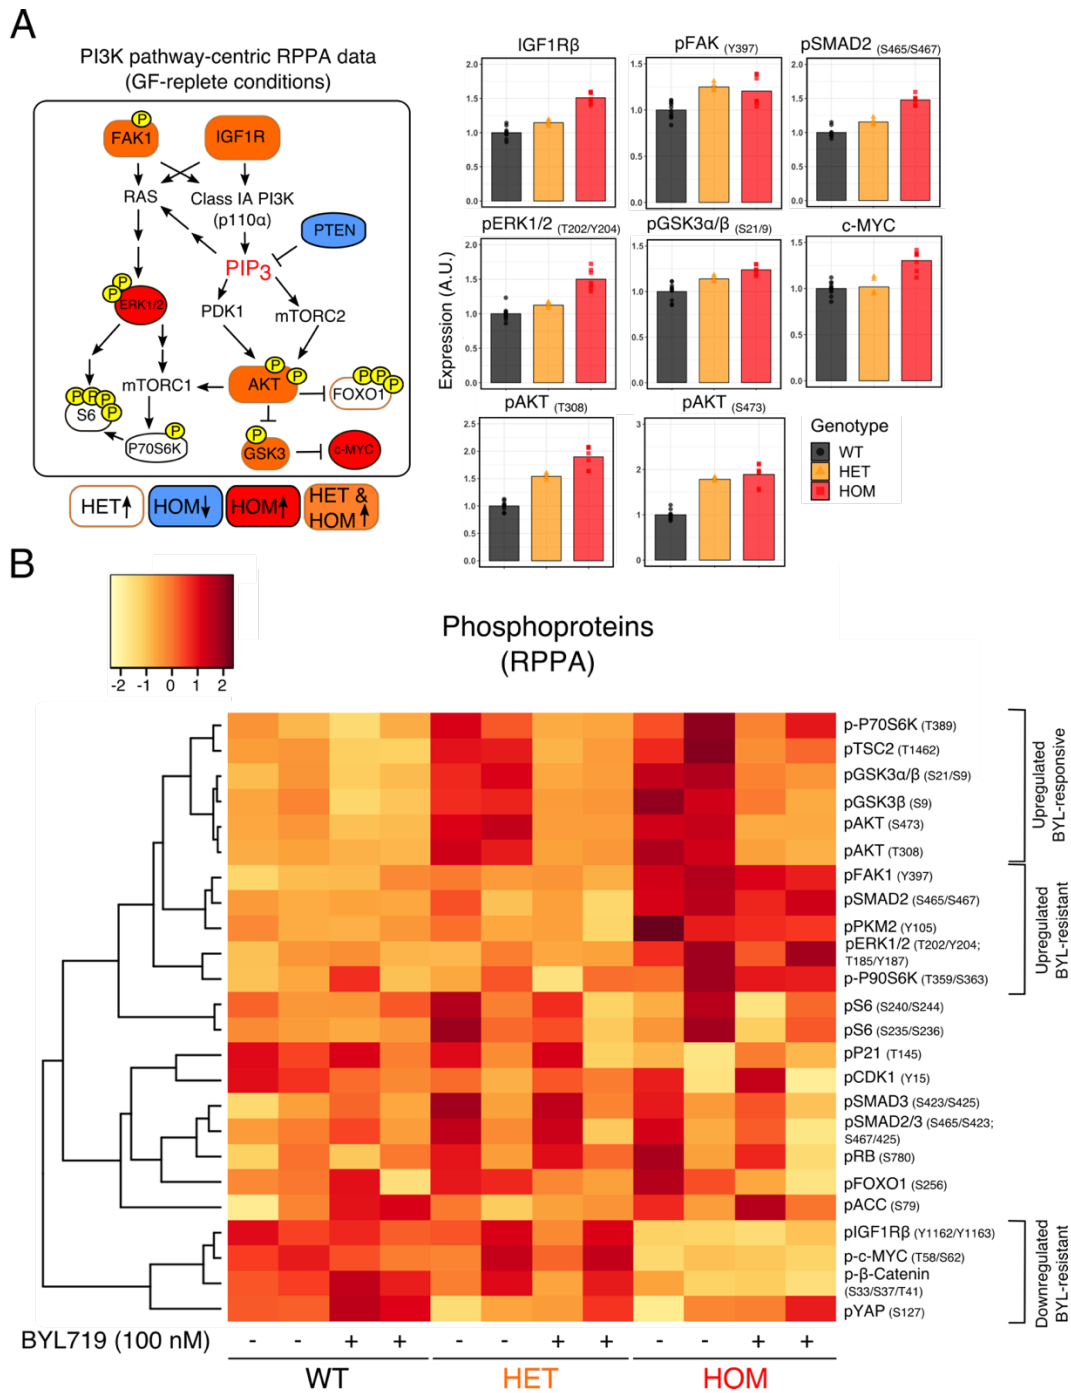

620

621

622 **Figure 2. Reverse Phase Protein Array (RPPA) of  $PIK3CA^{WT/H1047R}$  (HET) and  $PIK3CA^{H1047R/H1047R}$  (HOM)**  
 623 **human iPSCs. (A) Left:** Diagram of PI3K pathway-related phosphorylated proteins, with colour code used to  
 624 signify differentially expressed targets in  $PIK3CA^{H1047R}$  mutant iPSCs versus isogenic wild-type controls. Color-  
 625 coded targets were significant at  $FDR \leq 0.05$  (Benjamini-Hochberg). Right: Barplots show representative  
 626 examples of differentially expressed protein targets, revealing relatively modest quantitative changes.  
 627 Phosphorylated proteins were normalised to the corresponding total protein when available. The data are based

628 on 10 wild-type cultures (3 clones), 5 *PIK3CA*<sup>WT/H1047R</sup> cultures (3 clones) and 7 *PIK3CA*<sup>H1047R/H1047R</sup> cultures (2  
629 clones) as indicated. See also Fig. S3A. **(B)** Unsupervised hierarchical clustering based on target-wise  
630 correlations of RPPA data from wild-type (WT), *PIK3CA*<sup>WT/H1047R</sup> (HET) and *PIK3CA*<sup>H1047R/H1047R</sup> (HOM) iPSCs  
631 following short-term growth factor removal (1 h), +/- 100 nM BYL719 (PI3K $\alpha$  inhibitor) for 24 h. The data are  
632 from two independent experiments, each performed using independent clones. For each row, the colours  
633 correspond to Fast Green-normalised expression values in units of standard deviation (z-score) from the mean  
634 (centred at 0) across all samples (columns). Groups of phosphorylated proteins exhibiting a consistent  
635 expression pattern in BYL719-treated *PIK3CA*<sup>H1047R/H1047R</sup> iPSCs are specified. See also Fig. S3B.

636

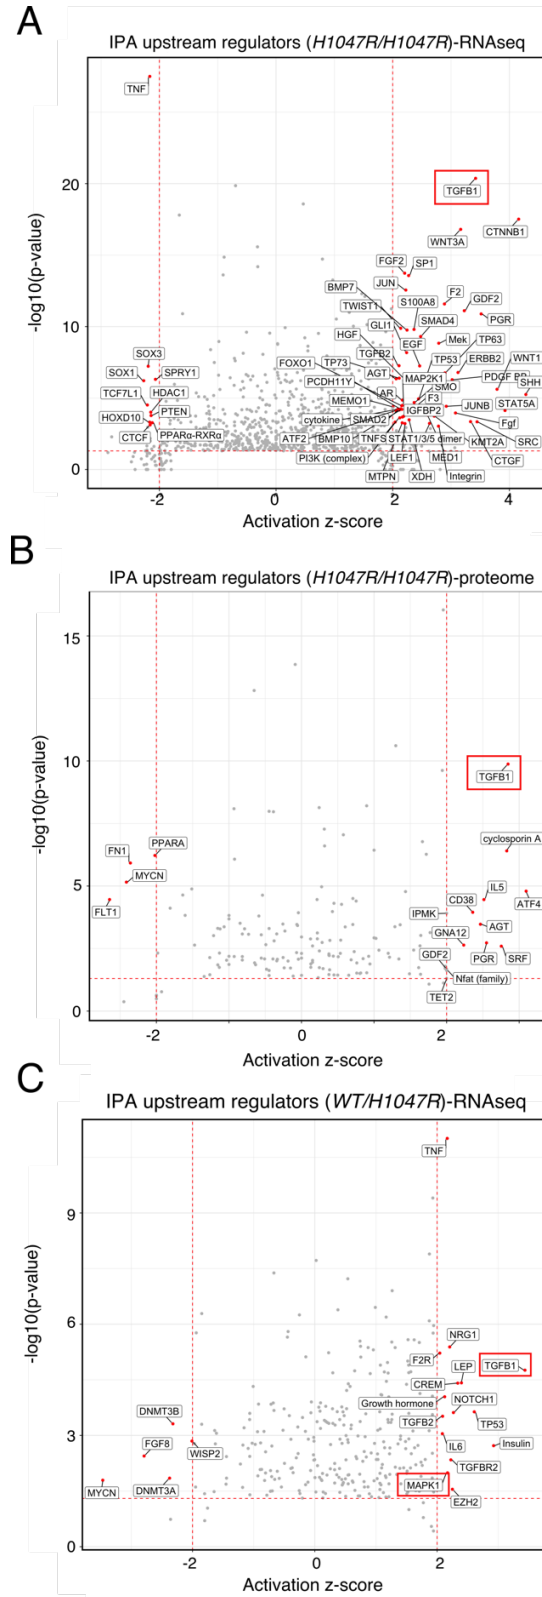

637

638

639 **Figure 3. Ingenuity® pathway analyses (IPA) predict activation of TGFβ signalling in heterozygous**  
640 **and homozygous *PIK3CA*<sup>H1047R</sup> iPSCs. (A)** IPA of upstream regulators using the list of top 2000  
641 upregulated and top 2000 downregulated mRNA transcripts in *PIK3CA*<sup>H1047R/H1047R</sup> iPSCs (for RNAseq  
642 details, see Fig. 1B). Red points signify transcripts with absolute predicted activation z-score > 2 and overlap  
643 P-value < 0.001 (Fisher's Exact Test). The red rectangle highlights the most significant upstream regulator,  
644 TGFβ1. **(B)** As in (A) but using the list of differentially-expressed proteins identified by total proteomics and  
645 red-colouring targets with predicted activation z-score > 2 and overlap P-value < 0.05 (Fisher's Exact Test).  
646 **(C)** As in (A) but using the list of differentially expressed total proteins in *PIK3CA*<sup>WT/H1047R</sup> iPSCs and red-  
647 colouring upstream regulators with absolute predicted bias-corrected z score > 2 and overlap P-value < 0.05  
648 (Fisher's Exact Test). Red rectangles highlight the two upstream regulators (TGFβ1 and MAPK1) with  
649 absolute predicted bias-corrected z score > 2 that remained significant (overlap P-value < 0.05) when the  
650 analysis was repeated using the list of shared and concordant differentially expressed genes (N = 180) in  
651 heterozygous and homozygous *PIK3CA*<sup>H1047R</sup> iPSCs vs wild-type controls.

652

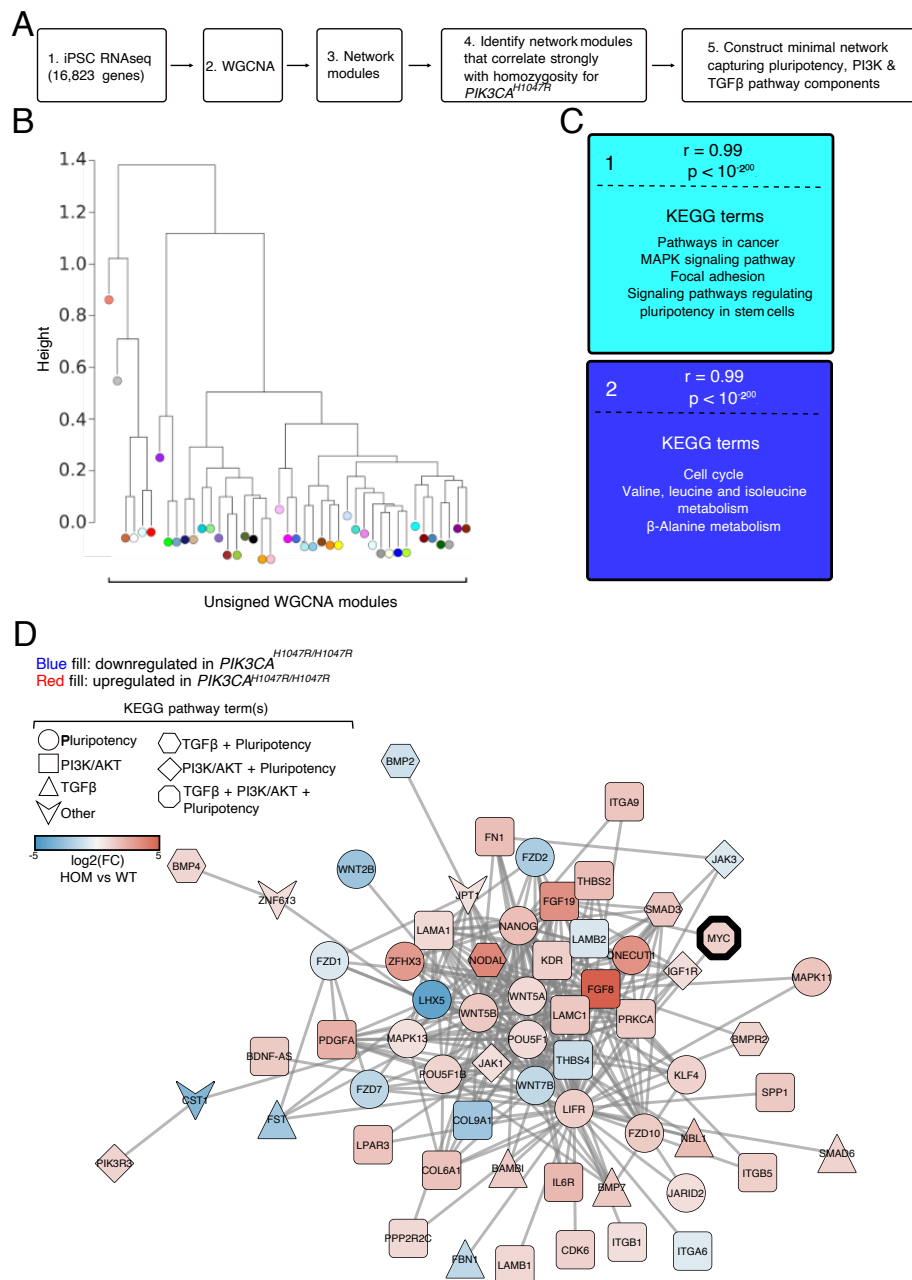

653

654 **Figure 4. Weighted gene correlation network analysis (WGCNA) identifies links among pluripotency**  
 655 **components, TGF $\beta$  and PI3K signalling. (A)** Schematic of the WGCNA workflow and subsequent data  
 656 selection for visualisation. **(B)** Unsigned WGCNA modules identified using the list of transcripts expressed in  
 657 wild-type,  $PIK3CA^{WT/H1047R}$  and  $PIK3CA^{H1047R/H1047R}$  iPSCs (for RNAseq details, see Fig. 1B). **(C)** The two  
 658 network modules with genes whose module membership correlated strongest with differential expression in  
 659 homozygous  $PIK3CA^{H1047R}$  iPSCs. The colour of each module corresponds to its colour in the module

21

660 dendrogram in (B). Representative KEGG pathways with significant enrichment in each gene network module  
661 are listed (hypergeometric test with two-sided uncorrected  $P < 0.05$ ). (D) The minimal network connecting  
662 KEGG pluripotency, PI3K/AKT and TGF $\beta$  pathway components within the turquoise gene network module. Fill  
663 colour and shape are used to specify direction of differential mRNA expression in *PIK3CA*<sup>H1047R/H1047R</sup> iPSCs  
664 and pathway membership, respectively. Fill colour saturation represents gene expression fold-change (FC;  
665 log<sub>2</sub>) in *PIK3CA*<sup>H1047R/H1047R</sup> (HOM) vs wild-type (WT) iPSCs. MYC is highlighted as the only network component  
666 intersecting all three KEGG pathways, suggesting it may comprise a key mechanistic link in the observed  
667 phenotype.

668

669

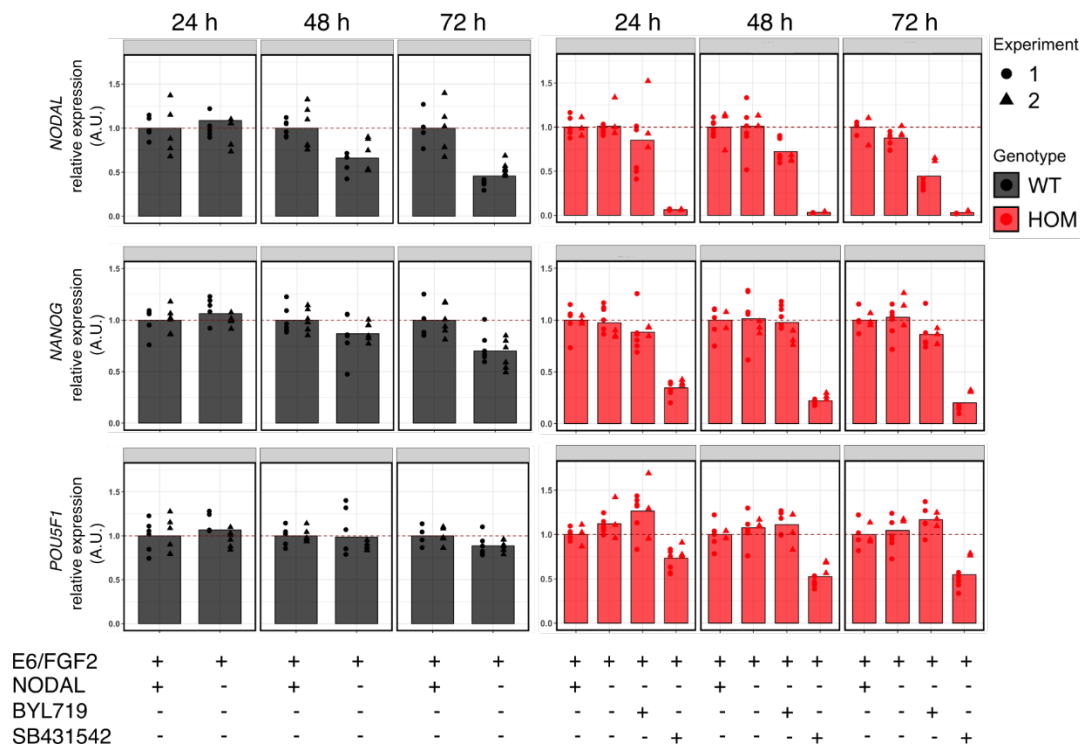

670

671

672 **Figure 5. TGF $\beta$  signalling-dependent regulation of stemness in *PIK3CA*<sup>H1047R/H1047R</sup> iPSCs.** Gene  
 673 expression time course of *NODAL*, *NANOG* and *POU5F1* in wild-type (WT) or *PIK3CA*<sup>H1047R/H1047R</sup> iPSCs  
 674 following the indicated treatments for 24 h, 48 h or 72 h. B250: 250 nM BYL719 (PI3K $\alpha$ -selective inhibitor);  
 675 E6/FGF2: Essential 6 medium supplemented with 10 ng/ml basic fibroblast growth factor 2 (FGF2). SB431542  
 676 is a specific inhibitor of the NODAL type I receptors ALK4/7 and the TGF $\beta$  type I receptor ALK5; used at 5  $\mu$ M.  
 677 When indicated, cultures were supplemented with 100 ng/ml NODAL. The data are from two independent  
 678 experiments, with each treatment applied to triplicate cultures of three wild-type and two homozygous iPSC  
 679 clones. To aid interpretation, gene expression values are normalised to the E6/FGF2 condition within each  
 680 genotype and time-point. An alternative visualisation that illustrates the differential expression of *NODAL* and  
 681 *NANOG* between mutant and wild-type cells is shown in Fig. S4A. For analysis of additional lineage markers,  
 682 see Fig. S4B. For representative micrographs of *PIK3CA*<sup>H1047R/H1047R</sup> iPSCs exposed to the different treatments,  
 683 see Fig. S5. A.U., arbitrary units.
